# Supplementary material
Source: PubMed Central journal article supplement (PMC3758235)

**Supplemental Figure 1. Downregulation of protein expression by various siRNAs.** EC (70% confluent) were transfected with 100 nM siRNA using DharmaFECT 1 transfection reagent per manufacturer's protocol. Silencing efficacy was checked 72 h after siRNA transfection by Western blot. Results are representative of several independent experiments.

**Supplemental Figure 2. Disruption of actin filaments attenuates EC barrier enhancement by FTY720.** HPAEC were preincubated for 1 h with the actin depolymerizing agent, cytochalasin D (cyto, 0.1  $\mu$ g/ml final) or vehicle control (first arrow) and then stimulated with FTY720 (1  $\mu$ M) or vehicle (second arrow). A representative TER tracing is shown.

Supplemental data

Fig. 1

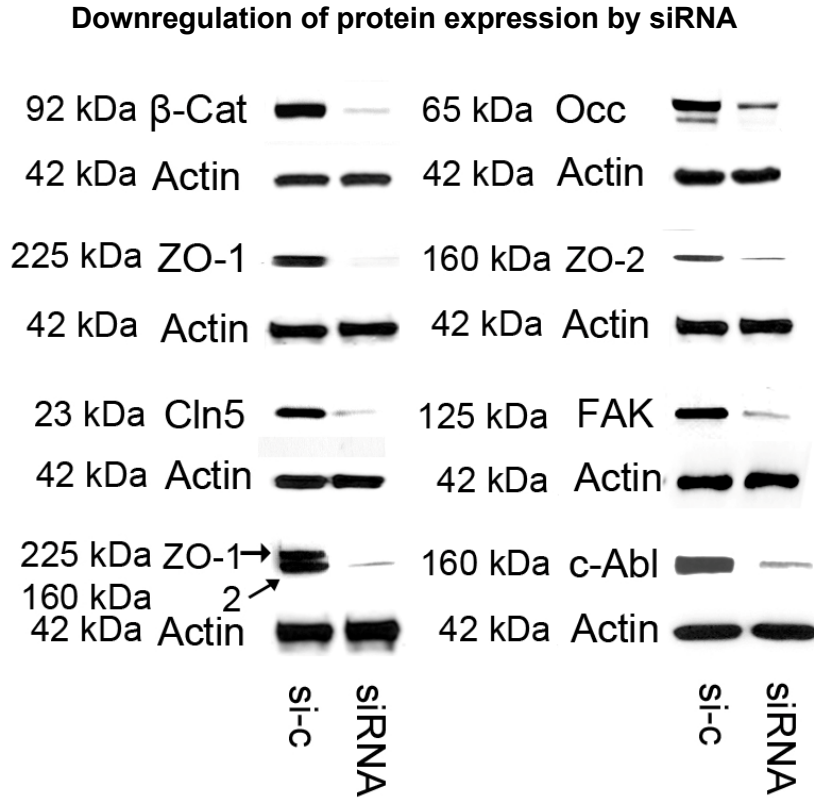

Fig. 2

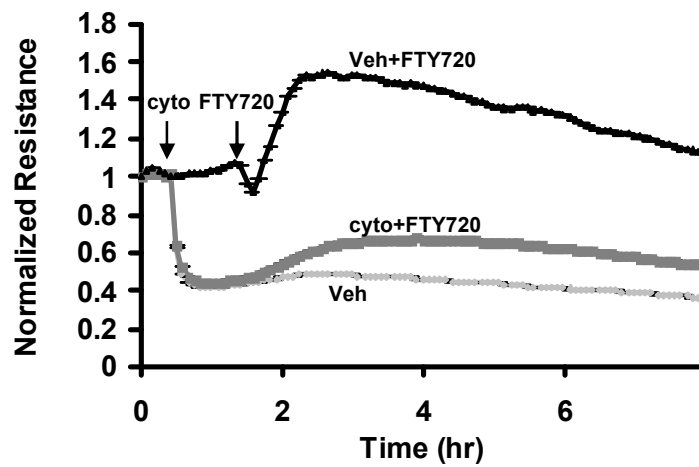

Supplement: NIHMS496585-supplement-01.pdf [file NIHMS496585-supplement-01.pdf]
